# Supplementary material for: Dietary eugenol ameliorates long-term high-fat diet-induced skeletal muscle atrophy: mechanistic insights from integrated multi-omics
Source: Royal Society of Chemistry journal article supplement (doi:10.1039/d4fo03648d), 2024-01-01
Supplement: d4fo03648d1.pdf [file d4fo03648d1.pdf]

1

## Supporting Information

2 **Table S1.** Composition of Chow, HFD, and EU group diet

|                             | Chow (3.42 Kcal/g)                                            | HFD (4.6 Kcal/g)   | EU (4.6 Kcal/g)    |
|-----------------------------|---------------------------------------------------------------|--------------------|--------------------|
| <b>Nutrient Information</b> | <b>% Kcal from</b>                                            | <b>% Kcal from</b> | <b>% Kcal from</b> |
| Protein                     | 22.5                                                          | 18.0               | 18.0               |
| Carbohydrate                | 65.4                                                          | 42.0               | 42.0               |
| Fat                         | 12.1                                                          | 40.0               | 40.0               |
| <b>Formula</b>              | <b>Representative Ingredients</b>                             | <b>g/kg</b>        | <b>g/kg</b>        |
| Casein                      | Soybean meal                                                  | 200                | 200                |
| DL-Methionine               | Lysine                                                        | 3                  | 3                  |
| Corn starch                 | Ground corn                                                   | 111                | 109                |
| Sucrose                     | Wheat flour                                                   | 370                | 370                |
| Cellulose                   | Wheat middlings                                               | 50                 | 50                 |
| Corn oil                    | Fish meal                                                     | 30                 | 30                 |
| Lard                        |                                                               | 170                | 170                |
| Cholesterol                 | Soybean oil                                                   | 10                 | 10                 |
| Mineral mixture             | Mineral mixture,<br>Calcium carbonate,<br>Calcium bicarbonate | 42                 | 42                 |
| Vitamin mixture             | Vitamin mixture                                               | 12                 | 12                 |
| Choline bitartrate          | Choline chloride                                              | 2                  | 2                  |
| tert-Butylhydroquinone      | /                                                             | 0.04               | 0.04               |

Eugenol

/

/

2

---

3

4

**Table S2.** Primer sequences used for RT-qPCR.

| Type  | Gene Description                                                                         | Sequences (5'→3')                                     |
|-------|------------------------------------------------------------------------------------------|-------------------------------------------------------|
| Mouse | Muscle atrophy F-box ( <i>MAFbx</i> )                                                    | F: GTCCAGAGAGTCGGCAAGTC<br>R: GTCGGTGATCGTGAGACCTT    |
|       | Muscle RING finger 1 ( <i>MuRF1</i> )                                                    | F: ACATCTACTGTCTCACGTGT<br>R: TGTCCTTGGAAGATGCTTTG    |
|       | Peroxisome proliferator-activated receptor gamma coactivator 1-alpha ( <i>PGC-1α1</i> )  | F: TAAATCTGCGGGATGATGGA<br>R: GTTTCGTTTCGACCTGCGTAA   |
|       | Insulin-like growth factor 1 ( <i>IGF-1</i> )                                            | F: TGCTGATTTTCCCATCGCT<br>R: AGAGCCTGCGCAATGGAATA     |
|       | Myostatin                                                                                | F: TCACGCTACCACGGAAACAA<br>R: AGGAGTCTTGACGGGTCTGA    |
|       | Peroxisome proliferator-activated receptor gamma coactivator 1-alpha4 ( <i>PGC-1α4</i> ) | F: TCACACCAAACCCACAGAAA<br>R: CTGGAAGATATGGCACAT      |
|       | Flap structure-specific endonuclease 1 ( <i>Fen1</i> )                                   | F: GGTGGAGGAGAGGTGACTAG<br>R: GCACA ACTACTGGACTCAGC   |
|       | Heme oxygenase 1 ( <i>Hmox1</i> )                                                        | F: CCTCACAGATGGCGTCACTT<br>R: TGGGGGCCAGTATTGCATTT    |
|       | Leptin ( <i>Lep</i> )                                                                    | F: GCTACAGGCCTTTTGTGGC<br>R: CCACAGAATGGGTGGGAGAC     |
|       | Nuclear factor (erythroid-derived 2)-like 2 ( <i>Nfe2l2</i> )                            | F: AGGACATGGAGCAAGTTTGG<br>R: TTGCCCTAAGCTCATCTCGT    |
|       | V-rel reticuloendotheliosis viral oncogene homolog A ( <i>Rela</i> )                     | F: GAGCCATTGGAGTTCCAGTA<br>R: TGGGGGAAA ACTCATCAAAG   |
|       | Transferrin receptor ( <i>Tfrc</i> )                                                     | F: GGAAGACTCTGCTTTGCAGCTAT<br>R: GCCCAGGTAGCCACTCATGA |
|       | Ubiquitin-like, containing PHD and RING finger domains, 1 ( <i>Uhrfl</i> )               | F: CTTCTTCACTCCCCTCACCA<br>R: TCCATGACACCCAGTCAGTG    |
|       | Glyceraldehyde-3-phosphate dehydrogenase ( <i>GAPDH</i> )                                | F: GTGATGGCATGGACTGTGGT<br>R: GGAGCCAAAAGGGTCATCAT    |

**Table S3.** Global network parameters.

| Parameters                 | Chow  | HFD   | EU    |
|----------------------------|-------|-------|-------|
| node number                | 88    | 80    | 79    |
| edge number                | 237   | 195   | 225   |
| clustering coefficient     | 0.475 | 0.513 | 0.476 |
| characteristic path length | 3.419 | 4.395 | 3.518 |
| average degree             | 5.944 | 5.067 | 6.235 |
| graph density              | 0.084 | 0.086 | 0.093 |

10

**Table S4.** Multi-omics network parameters

| Node1 Name              | Node2 Name        | Coefficient |
|-------------------------|-------------------|-------------|
| 7-demethylsuberosin     | Rela              | -0.53619    |
| Pg 32:0                 | g__Muribaculum    | -0.66667    |
| Guanine                 | g__Muribaculum    | -0.67026    |
| His-Lys                 | g__Muribaculum    | -0.66667    |
| AICAR                   | g__Muribaculum    | -0.62366    |
| DI-2-aminocaprylic acid | g__Muribaculum    | 0.84588     |
| Betonicine              | g__Muribaculum    | 0.80287     |
| Hmox1                   | g__Faecalibaculum | 0.57357     |
| Tfrc                    | g__Faecalibaculum | -0.7248     |

11

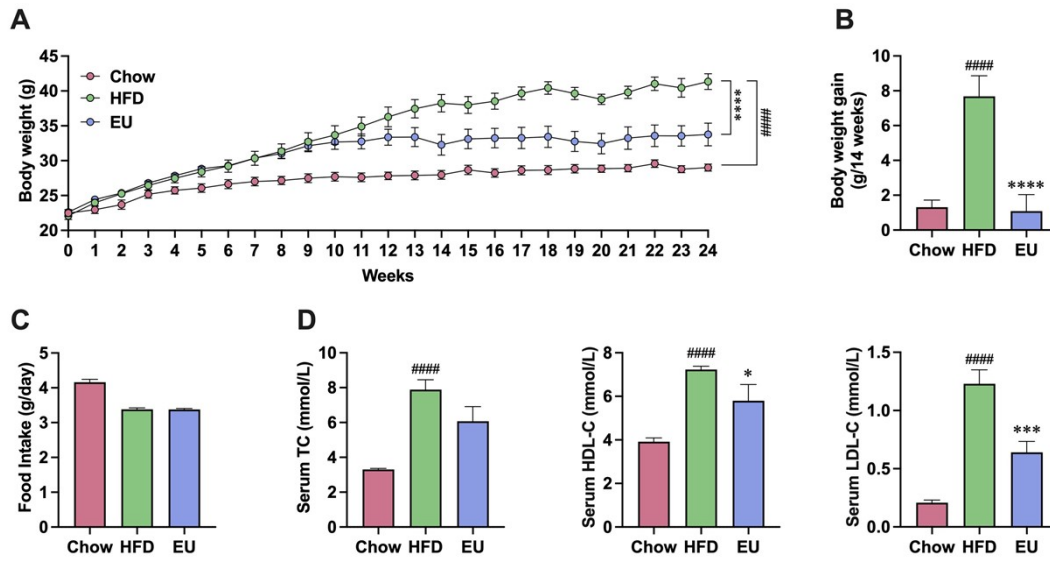

12

13 **Figure S1.** Supplementation of EU attenuates obesity in HFD-fed mice. (A) Body  
 14 weight change. (B) Body weight gain during 14-week EU supplementation. (C) Daily  
 15 food intake during 14-week EU supplementation. (D) Serum TC, HDL-C, and LDL-C  
 16 levels. Data were represented as the mean  $\pm$  SEM and were analyzed using one-way  
 17 ANOVA with Dunnett's multiple-comparisons test.  $n = 8-10$ . ##### $p < 0.0001$   
 18 compared with Chow group. \* $p < 0.05$ , \*\*\* $p < 0.001$ , \*\*\*\* $p < 0.0001$  compared with  
 19 HFD group.
